# Supplementary material for: Charge recombination studies in conformally coated trifluoroacetate/TiO2 modified dye sensitized solar cells (DSSC)
Source: Royal Society of Chemistry journal article supplement (doi:10.1039/b818968d), 2009-01-01
Supplement: b818968d.pdf [file b818968d.pdf]

**Charge Recombination Studies in Conformally Coated  
Trifluoroacetate /TiO<sub>2</sub> Modified Dye Sensitized Solar Cells  
(DSSC)**

**Supplementary Information**

**Antonio Sánchez-Díaz,<sup>a</sup> Eugenia Martínez-Ferrero<sup>\*a</sup> and Emilio  
Palomares<sup>\*a,b</sup>**

<sup>a</sup> Institute of Chemical Research of Catalonia (ICIQ), Av. Països Catalans 16, Tarragona E-43007, Spain. Fax: +34977920240; Tel: +3497792041; E-mail: [emartinez@iciq.es](mailto:emartinez@iciq.es); [epalomares@iciq.es](mailto:epalomares@iciq.es)

<sup>b</sup> Catalan Institution for Research and Advanced Studies (ICREA).

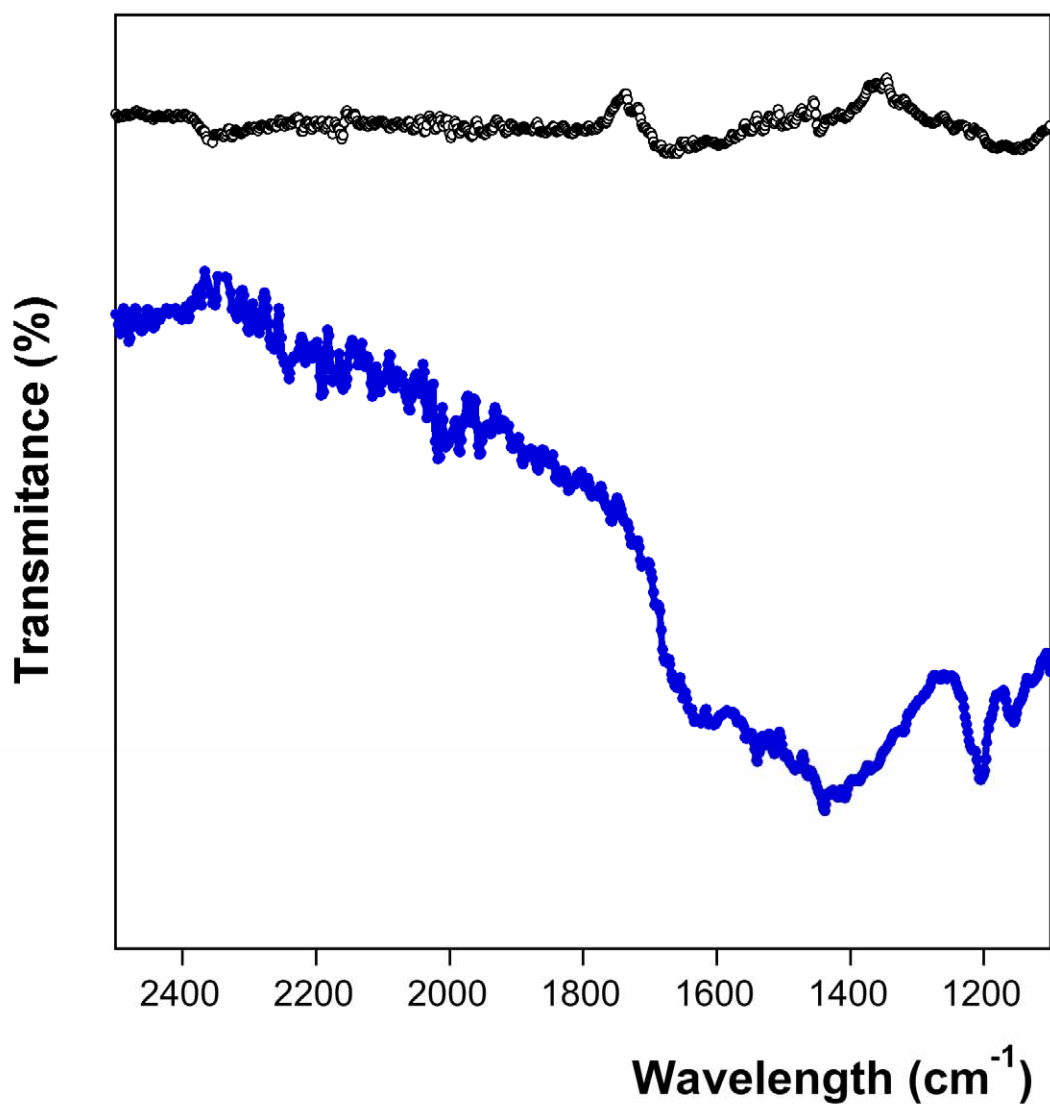

**FIG. S1.** FT-IR spectra for TiO<sub>2</sub> (black) and TFA-TiO<sub>2</sub> (blue) films. The peaks at 1150 and 1205 cm<sup>-1</sup> are assigned to the C-F stretching vibration, while the bands at 1407, 1442 and 1621 cm<sup>-1</sup> are characteristic of the stretching of the carbonyl group.
